# Supplementary material for: Ripply suppresses Tbx6 to induce dynamic-to-static conversion in somite segmentation
Source: PubMed Central journal article supplement (PMC10102234; doi:10.1038/s41467-023-37745-w), 2023-04-13
Supplement: 41467_2023_37745_MOESM3_ESM.pdf [file 41467_2023_37745_MOESM3_ESM.pdf]

## Description of Additional Supplementary Files

### File name: Supplementary Movie 1

Description: Time lapse movies of a wild-type embryo in which endogenous Her7 can be visualized by tagging with three copies of the Achilles, fast-maturing YFP variant at 1 frame/min.

### File name: Supplementary Movie 2

Description: Time lapse movies of a *rippy1; ripply2* double-mutant embryo in which endogenous Her7 can be visualized by tagging with three copies of the Achilles, fast-maturing YFP variant at 1 frame/min.

### File name: Supplementary Movie 3

Description: The result of mathematical simulation of wild-type embryos showing temporal changes in Her protein (green), dpErk (orange), Tbx6 protein (cyan), *rippy-intron* mRNA (magenta) and Ripply protein (black). The horizontal axis indicates space ( $\mu\text{m}$ : anterior on the left) and the vertical axis indicates relative levels of mRNA and proteins.

### File name: Supplementary Movie 4

Description: The result of mathematical simulation without the positive feedback loop of Tbx6 protein. Spatial patterns of Her protein (green), *rippy-intron* mRNA (magenta), Ripply protein (black), Tbx6 protein (cyan) and dpErk protein (orange) are shown. The horizontal axis indicates space ( $\mu\text{m}$ : anterior on the left) and the vertical axis indicates relative levels of mRNA and proteins. The positive feedback loop in the equation for Tbx6 protein levels was replaced with a constant value.

### File name: Supplementary Movie 5

Description: The result of mathematical simulation of *rippy*-defective embryos showing temporal changes in *her-intron* mRNA (green) and *her-exon* mRNA (magenta), compared with those of dpErk protein (orange) and Tbx6 protein (cyan). (Top) Simulation of wild type with *rippy* transcription. (Bottom) Simulation of *rippy* KO by setting the maximum transcription rate of *rippy* mRNA to zero. The horizontal axis indicates space ( $\mu\text{m}$ : anterior on the left) and the vertical axis indicates relative levels of mRNAs and proteins. To show oscillation in the anterior part, we used an array of  $N = 63$  cells. The array represents the tissue region 630  $\mu\text{m}$  anterior to the tailbud.

### File name: Supplementary Movie 6

Description: The result of mathematical simulation of *her*-defective embryos showing temporal changes in *rippy-intron* mRNA (magenta) with those of dpErk (orange) and Tbx6 proteins (cyan). The horizontal axis indicates space ( $\mu\text{m}$ : anterior on the left) and the vertical axis indicates relative levels of mRNA and proteins. At  $t = 82$  min, dpErk activity was reduced by 10-fold to model the effect of MEK1 inhibitor. To model *her* KO, we multiplied the transcription term of *her* mRNA by zero.

### File name: Supplementary Movie 7

Description: The result of mathematical simulation of wild-type embryos, similar to Supplementary Movie 3, but with a stepwise retreat of dpErk activity. Spatial patterns of Her protein (green), *rippy-intron* mRNA (magenta), Ripply protein (black), Tbx6 protein (cyan) and dpErk protein (orange) are shown. The horizontal axis indicates space ( $\mu\text{m}$ : anterior on the left) and the vertical axis indicates relative levels of mRNA and proteins. The position of the anterior border of dpErk protein shifts at each oscillation cycle.

**File name: Supplementary Software 1**

Description: The C program and Mathematica codes that were used to simulate the mathematical model and visualize results.
