# Supplementary material for: Ripply suppresses Tbx6 to induce dynamic-to-static conversion in somite segmentation
Source: PubMed Central journal article supplement (PMC10102234; doi:10.1038/s41467-023-37745-w), 2023-04-13
Supplement: 41467_2023_37745_MOESM12_ESM.pdf [file 41467_2023_37745_MOESM12_ESM.pdf]

## Reporting Summary

Nature Portfolio wishes to improve the reproducibility of the work that we publish. This form provides structure for consistency and transparency in reporting. For further information on Nature Portfolio policies, see our [Editorial Policies](#) and the [Editorial Policy Checklist](#).

### Statistics

For all statistical analyses, confirm that the following items are present in the figure legend, table legend, main text, or Methods section.

n/a Confirmed

- The exact sample size ( $n$ ) for each experimental group/condition, given as a discrete number and unit of measurement
- A statement on whether measurements were taken from distinct samples or whether the same sample was measured repeatedly
- The statistical test(s) used AND whether they are one- or two-sided  
*Only common tests should be described solely by name; describe more complex techniques in the Methods section.*
- A description of all covariates tested
- A description of any assumptions or corrections, such as tests of normality and adjustment for multiple comparisons
- A full description of the statistical parameters including central tendency (e.g. means) or other basic estimates (e.g. regression coefficient) AND variation (e.g. standard deviation) or associated estimates of uncertainty (e.g. confidence intervals)
- For null hypothesis testing, the test statistic (e.g.  $F$ ,  $t$ ,  $r$ ) with confidence intervals, effect sizes, degrees of freedom and  $P$  value noted  
*Give  $P$  values as exact values whenever suitable.*
- For Bayesian analysis, information on the choice of priors and Markov chain Monte Carlo settings
- For hierarchical and complex designs, identification of the appropriate level for tests and full reporting of outcomes
- Estimates of effect sizes (e.g. Cohen's  $d$ , Pearson's  $r$ ), indicating how they were calculated

*Our web collection on [statistics for biologists](#) contains articles on many of the points above.*

### Software and code

Policy information about [availability of computer code](#)

Data collection

Laica SP8 (LAS X; 3.1.5) and Zeiss Light-sheet microscope (Zen) were used for image data collection. TAL Effector Nucleotide Targeter 2.0 (<https://tale-nt.cac.cornell.edu/node/add/talen-old>) was used for the design of TALEN. Custom code written in C language which is attached in the "Supplementary Software" was used for numerical simulations of the mathematical model.

Data analysis

ImageJ(FIJI; 2.0.0), R (4.1.2) and Genetyx-mac were used for image data analysis, statistical analysis and DNA sequence analysis, respectively.

For manuscripts utilizing custom algorithms or software that are central to the research but not yet described in published literature, software must be made available to editors and reviewers. We strongly encourage code deposition in a community repository (e.g. GitHub). See the Nature Portfolio [guidelines for submitting code & software](#) for further information.

### Data

Policy information about [availability of data](#)

All manuscripts must include a [data availability statement](#). This statement should provide the following information, where applicable:

- Accession codes, unique identifiers, or web links for publicly available datasets
- A description of any restrictions on data availability
- For clinical datasets or third party data, please ensure that the statement adheres to our [policy](#)

Raw data associated the figures are included in the Source Data file. All the other data are available within the article and its Supplementary Information.

## Human research participants

Policy information about [studies involving human research participants and Sex and Gender in Research](#).

|                             |                                         |
|-----------------------------|-----------------------------------------|
| Reporting on sex and gender | not applicable' in all the below fields |
| Population characteristics  | not applicable' in all the below fields |
| Recruitment                 | not applicable' in all the below fields |
| Ethics oversight            | not applicable' in all the below fields |

Note that full information on the approval of the study protocol must also be provided in the manuscript.

## Field-specific reporting

Please select the one below that is the best fit for your research. If you are not sure, read the appropriate sections before making your selection.

Life sciences       Behavioural & social sciences       Ecological, evolutionary & environmental sciences

For a reference copy of the document with all sections, see [nature.com/documents/nr-reporting-summary-flat.pdf](https://nature.com/documents/nr-reporting-summary-flat.pdf)

## Life sciences study design

All studies must disclose on these points even when the disclosure is negative.

|                 |                                                                                                                                                                                                                                                                                                                                                                    |
|-----------------|--------------------------------------------------------------------------------------------------------------------------------------------------------------------------------------------------------------------------------------------------------------------------------------------------------------------------------------------------------------------|
| Sample size     | No sample size calculation was performed. Detailed n number are provided in the figures or figure legends. The sample size was determined according to previous studies using similar analyses (Shih et al. Development 2016, Haraoka et al. Nat. Commun. 2022 and Ban et al. Development 2019)                                                                    |
| Data exclusions | No data was excluded from the analysis in this study.                                                                                                                                                                                                                                                                                                              |
| Replication     | At least two independent experiments were taken to verify the reproducibility of the experimental findings in all experiments. All experiments were reliably reproduced.                                                                                                                                                                                           |
| Randomization   | After the removal of unhealthy embryos before the onset of somitogenesis, embryos were randomly allocated to experimental groups. In the transplantation assay and transient HA-ripply1 expression assay in Fig.1, Fig.6 and Fig.S2, the embryos were sorted by expression of fluorescent signals of Rhodamine and eGFP respectively before the random allocation. |
| Blinding        | No blinding was used because all experiments were conducted and analyzed by one person. Genotyping of each embryo was performed automatically, regardless of the results of experiments with each embryo.                                                                                                                                                          |

## Reporting for specific materials, systems and methods

We require information from authors about some types of materials, experimental systems and methods used in many studies. Here, indicate whether each material, system or method listed is relevant to your study. If you are not sure if a list item applies to your research, read the appropriate section before selecting a response.

### Materials & experimental systems

| n/a                                 | Involved in the study                                           |
|-------------------------------------|-----------------------------------------------------------------|
| <input type="checkbox"/>            | <input checked="" type="checkbox"/> Antibodies                  |
| <input type="checkbox"/>            | <input checked="" type="checkbox"/> Eukaryotic cell lines       |
| <input checked="" type="checkbox"/> | <input type="checkbox"/> Palaeontology and archaeology          |
| <input type="checkbox"/>            | <input checked="" type="checkbox"/> Animals and other organisms |
| <input checked="" type="checkbox"/> | <input type="checkbox"/> Clinical data                          |
| <input checked="" type="checkbox"/> | <input type="checkbox"/> Dual use research of concern           |

### Methods

| n/a                                 | Involved in the study                           |
|-------------------------------------|-------------------------------------------------|
| <input checked="" type="checkbox"/> | <input type="checkbox"/> ChIP-seq               |
| <input checked="" type="checkbox"/> | <input type="checkbox"/> Flow cytometry         |
| <input checked="" type="checkbox"/> | <input type="checkbox"/> MRI-based neuroimaging |

## Antibodies

### Antibodies used

Rabbit anti-GFP Antibody 1:2000, Thermo Fisher; A-11122, lot no. 2015992  
 Mouse anti-dpERK Antibody 1:2000, Sigma; M9692, batch#0000102442  
 Mouse anti-V5 Antibody 1:2000, Invitrogen; 46-0705, lot no.505729  
 Mouse anti-Tbx6 Antibody 1:200 gifted from Dr. Oates-AC  
 Rabbit anti-Tbx6 Antibody 1:500 generated in Dr. Takada's lab.  
 Goat HRP-labeled anti-mouse IgG Antibody 1:300 Promega; W402B, lot no. 39709501  
 Goat HRP-conjugated anti-Rabbit IgG Antibody 1:2000 Jackson Lab.111-035-114 74426  
 mouse Anti-γ-Tubulin antibody (GTU88)1:1000 Sigma; T6557, lot no. unknown  
 Goat anti-mouse IgG Alexa 647 1:800 ThermoFisher;A21235, lot no. 2031175  
 Goat anti-rabbit IgG Alexa 6471:800 ThermoFisher;A21245, lot no. 1037285  
 Rabbit anti-fibronectin antibody 1:200 Sigma; F3648, lot no. unknown  
 Goat anti-rabbit IgG Alexa 488 1:700 ThermoFisher; A11008, lot no. 1853312  
 Mouse rat anti-HA antibody (3F10) 1:500 Roche; 12158167001 lot no.11867423001  
 Chicken anti-GFP antibody 1:500 Abcam; ab13970, lot no. GR3361051-14  
 Goat anti-chicken IgG Alexa 488 1:700 ThermoFisher; A11039, lot no. 1869581  
 Goat anti-rat IgG Alexa 555 1:700 ThermoFisher; A21434, lot no. 1423054  
 Sheep Anti-Digoxigenin-AP, Fab fragments 1:10000 Roche; 11093274910, lot no.32871923  
 Sheep Anti-Digoxigenin-POD, Fab fragments 1:1000 Roche; 11207733910, lot no.43500600  
 Rabbit anti-b-catenin, 1:1000 Sigma; C2206, lot no. 099k4828  
 Goat anti-mouse IgG Alexa 488, 1/700; Thermo Fisher; A11001, lot no. unknown

### Validation

#### Primary Antibodys used for IHC

Rabbit anti-Tbx6 antibody was validated in Wanglar et al., PLOS one, 2014 by Western blotting with Tbx6 expressing HEK293t cells.  
 mouse anti-Tbx6 antibody was validated in Winder et al., Development, 2015 by IHC using WT and tbx6 mutant embryo.  
 About commercially available antibodies the validation statements on the manufacturer's website are as follows.  
 Rabbit anti-GFP Antibody (#A-11122); <https://www.thermofisher.com/antibody/product/GFP-Antibody-Polyclonal/A-11122>  
 Mouse anti-dpERK Antibody (#M9692); <https://www.sigmaaldrich.com/JP/en/product/mm/mabn842>  
 Mouse anti-V5 Antibody (#46-0705); <https://www.thermofisher.com/antibody/product/V5-Tag-Antibody-Monoclonal/R960-25>  
 mouse Anti-γ-Tubulin antibody;GTU88 (#T6557); <https://www.sigmaaldrich.com/JP/en/product/sigma/t6557>  
 Rabbit anti-fibronectin antibody (#F3648); <https://www.sigmaaldrich.com/JP/en/product/sigma/f3648>  
 Mouse rat anti-HA antibody; 3F10 (#12158167001);<https://www.sigmaaldrich.com/JP/en/product/roche/12158167001>  
 Chicken anti-GFP antibody (#ab13970); <https://www.abcam.com/products/primary-antibodies/gfp-antibody-ab13970.html>  
 Rabbit anti-b-catenin (#C2206); <https://www.sigmaaldrich.com/JP/en/product/sigma/c2206>

#### Antibodys used for in situ hybridization analysis

Sheep Anti-Digoxigenin-AP, Fab fragments (#11093274910); <https://www.sigmaaldrich.com/JP/en/product/roche/11093274910>  
 Sheep Anti-Digoxigenin-POD, Fab fragments (#11207733910); <https://www.sigmaaldrich.com/JP/en/product/roche/11207733910>

## Eukaryotic cell lines

Policy information about [cell lines and Sex and Gender in Research](#)

### Cell line source(s)

HEK 293T were gifted by Dr. Takeichi (RIKEN)

### Authentication

The cells were not authenticated.

### Mycoplasma contamination

All cell lines were tested negative for mycoplasma contamination.

### Commonly misidentified lines (See [ICLAC](#) register)

No cell lines listed were used in this study.

## Animals and other research organisms

Policy information about [studies involving animals](#); [ARRIVE guidelines](#) recommended for reporting animal research, and [Sex and Gender in Research](#)

### Laboratory animals

Zebrafish with the TL2 background were used as the wild type. Genetic background of Tg(her1:her1-Venus) and ti1 are mix of TL2 and original background. Other mutant and transgenic fish carry mutations or transgenes in TL2 bacground. Eggs were collected by crossing of 4-12 month old parents fish to use experiments.

### Wild animals

No wild animal was used in this study.

### Reporting on sex

In zebrafish, sex is considered to be determined after the embryogenesis. Therefore, in this study all of experiment were performed before the sex determination of embryos.

Field-collected samples

No field collected sample was used in this study.

Ethics oversight

This study was performed in accordance with Guidelines for Animal Experimentation of the National Institutes of Natural Sciences, with approval of the Animal Care and Use Committee (IACAC) of the National Institutes of Natural Sciences.

Note that full information on the approval of the study protocol must also be provided in the manuscript.
